# Supplementary material for: Oxygen chemistry of halogen-doped CeO2(111)
Source: Royal Society of Chemistry journal article supplement (doi:10.1039/d1cp01320c), 2021-01-01
Supplement: d1cp01320c1.pdf [file d1cp01320c1.pdf]

## Oxygen chemistry of halogen-doped $\text{CeO}_2(111)$ – supplementary information

Matthew J. Wolf<sup>a</sup>, Ernst D. Larsson<sup>b</sup>, and Kersti Hermansson<sup>c</sup>

<sup>a</sup>*Department of Physics, University of Bath, Claverton Down, Bath, BA2 7AY, United Kingdom*

<sup>b</sup>*Division of Theoretical Chemistry, Lund University, Chemical Centre, P. O. Box 124, SE-221 00 Lund, Sweden*

<sup>c</sup>*Department of Chemistry – Ångström Laboratory, Uppsala University, Box 538, SE-751 21 Uppsala, Sweden*

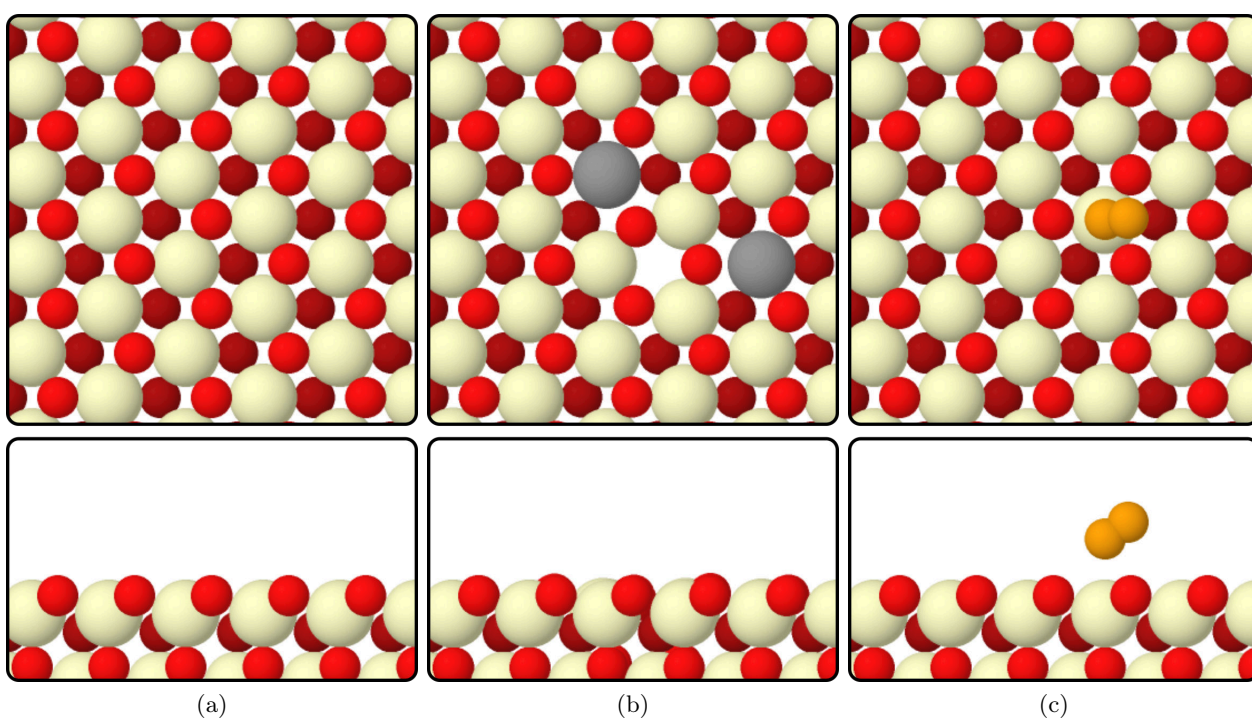

Figure S1: **Structures related to the stoichiometric surface.** (a) The pristine surface. (b) A sub-surface oxygen vacancy. (c) An adsorbed oxygen molecule. Colour scheme: bright red – surface oxygen; dark red – sub-surface oxygen; off-white – cerium(IV); grey – cerium(III); orange – oxygen molecule.

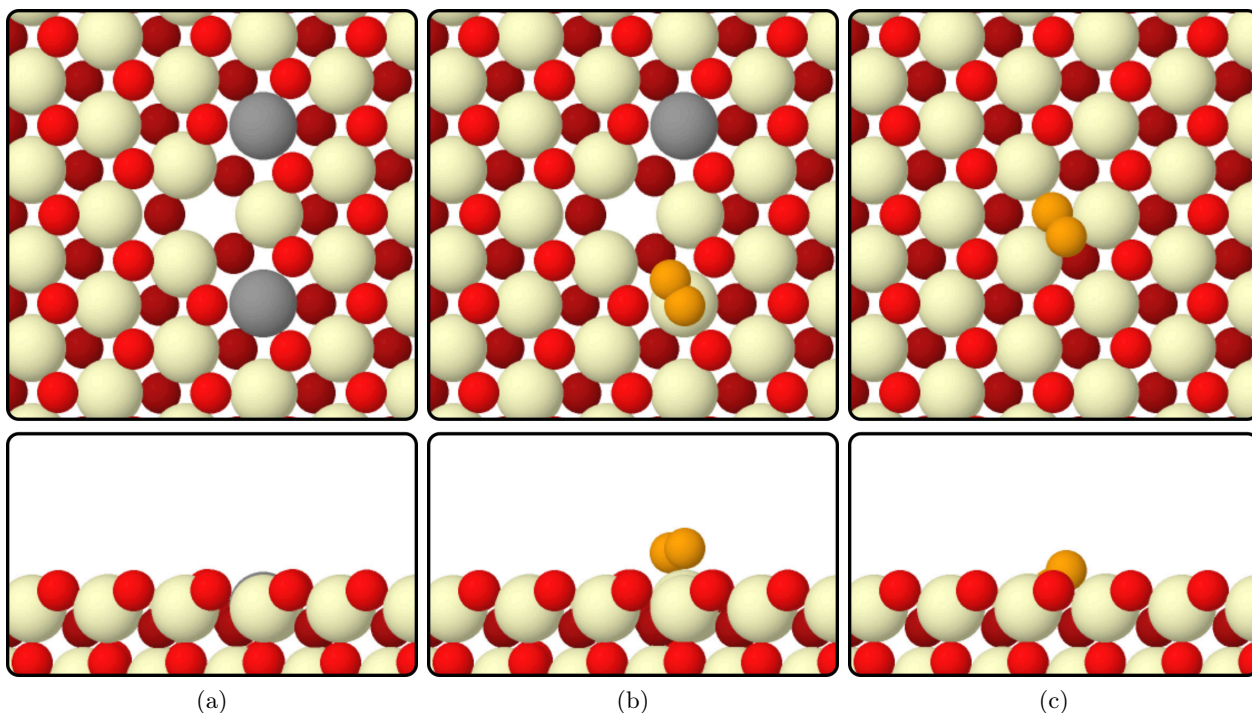

Figure S2: **Structures related to a surface oxygen vacancy.** (a) An isolated vacancy. (b) A superoxide molecule adsorbed in the vicinity of a vacancy. (c) A peroxide molecule in a vacancy. Colour scheme: bright red – surface oxygen; dark red – sub-surface oxygen; off-white – cerium(IV); grey – cerium(III); orange – superoxide molecule in (b), peroxide molecule in (c).

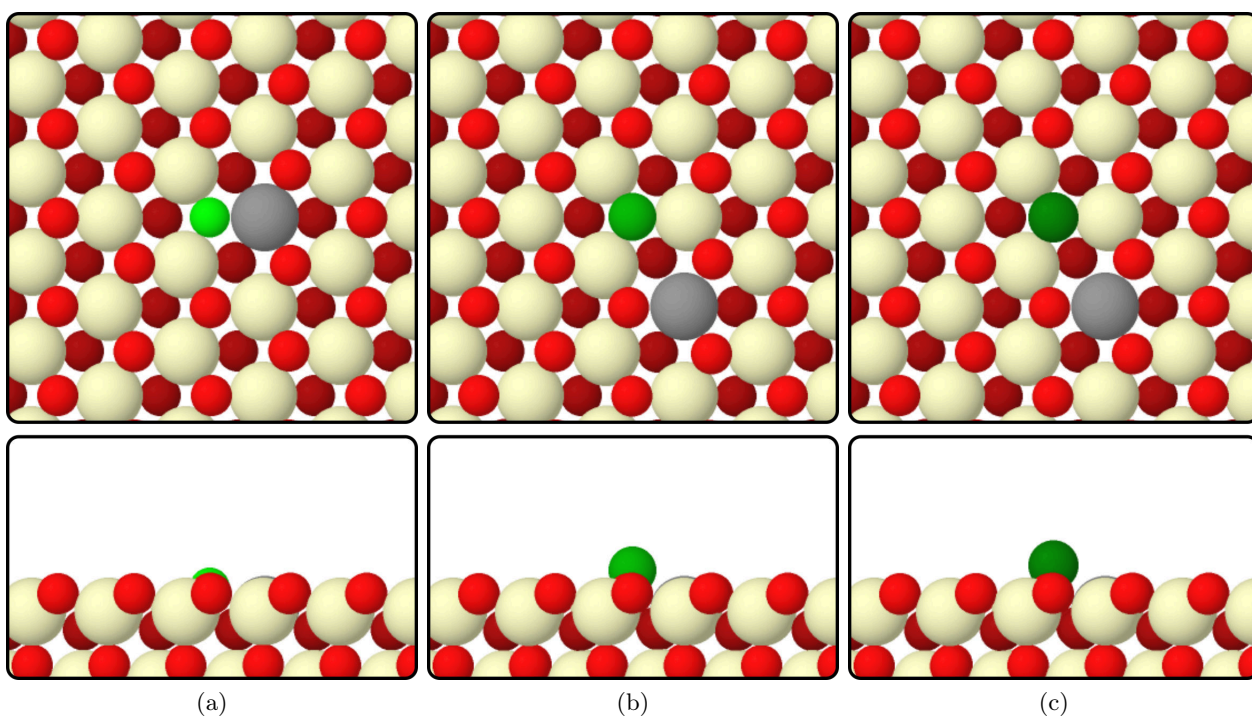

Figure S3: **A surface halogen impurity.** (a) Fluorine. (b) Chlorine. (c) Bromine. Colour scheme: bright red – surface oxygen; dark red – sub-surface oxygen; off-white – cerium(IV); grey – cerium(III); green – halogen.

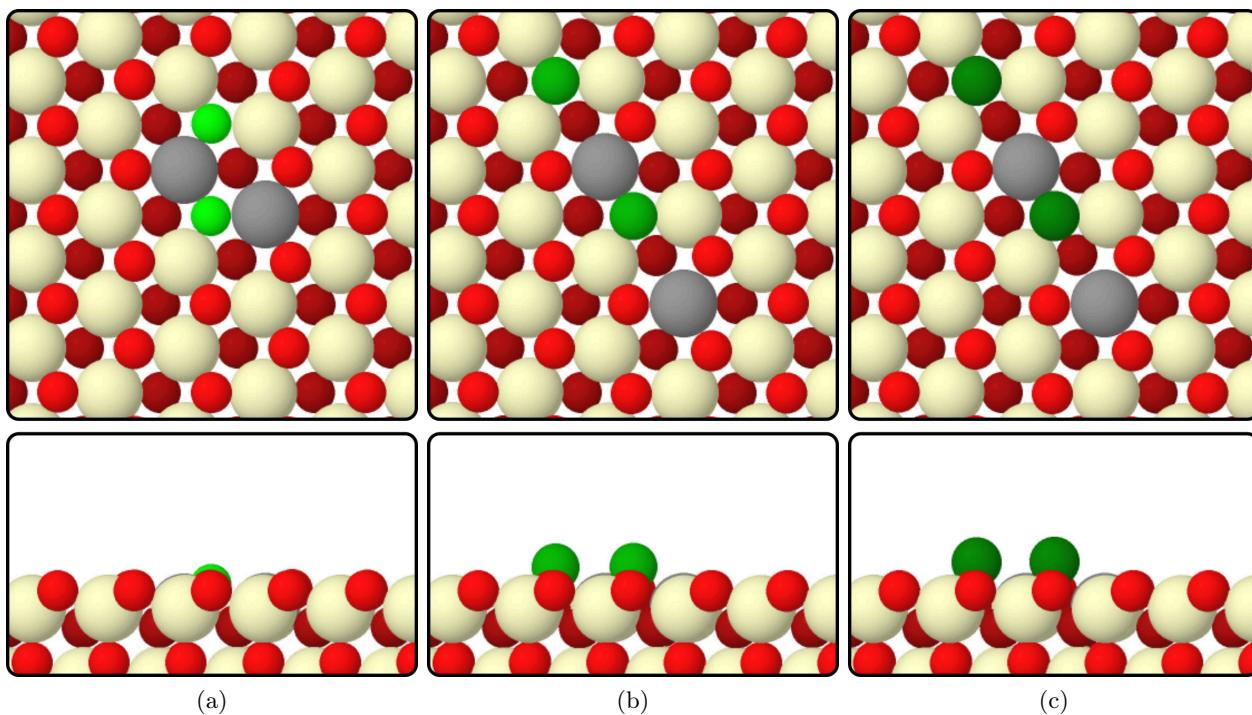

Figure S4: **A pair of surface halogen impurities.** (a) Fluorine. (b) Chlorine. (c) Bromine. Colour scheme: bright red – surface oxygen; dark red – sub-surface oxygen; off-white – cerium(IV); grey – cerium(III); green – halogen.

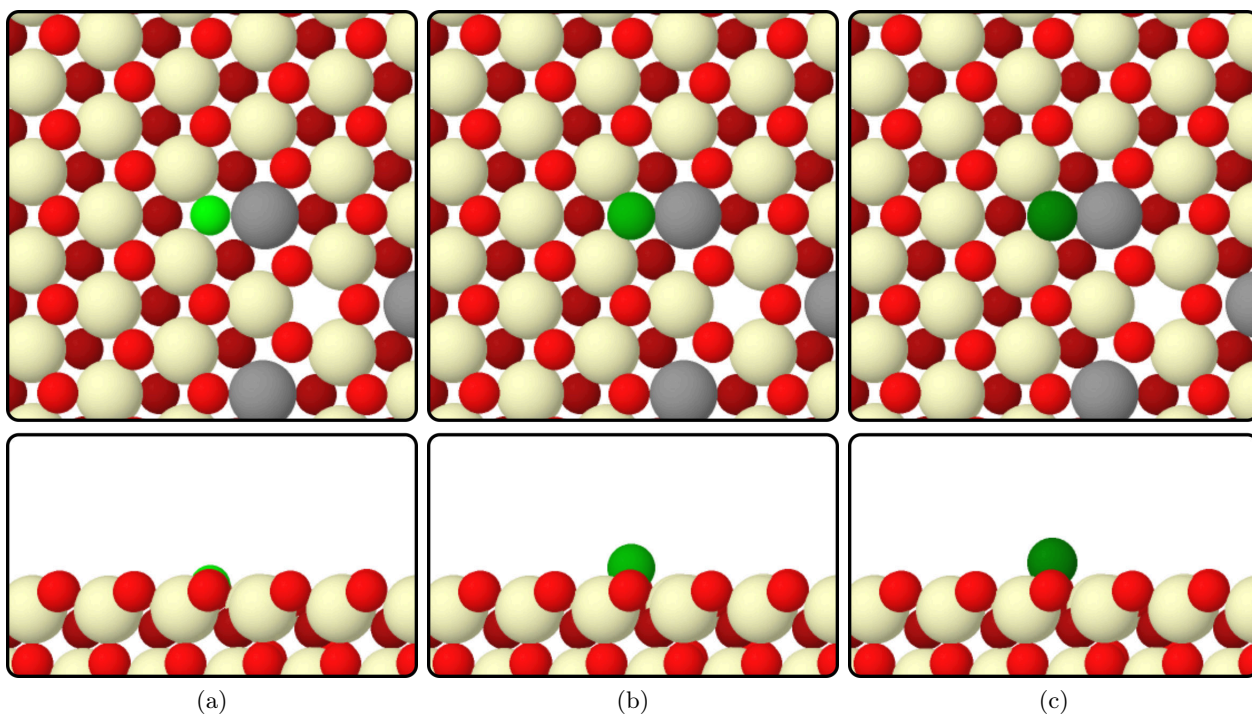

Figure S5: **A sub-surface oxygen vacancy in the vicinity of a surface halogen impurity.** (a) Fluorine. (b) Chlorine. (c) Bromine. Colour scheme: bright red – surface oxygen; dark red – sub-surface oxygen; off-white – cerium(IV); grey – cerium(III); green – halogen.

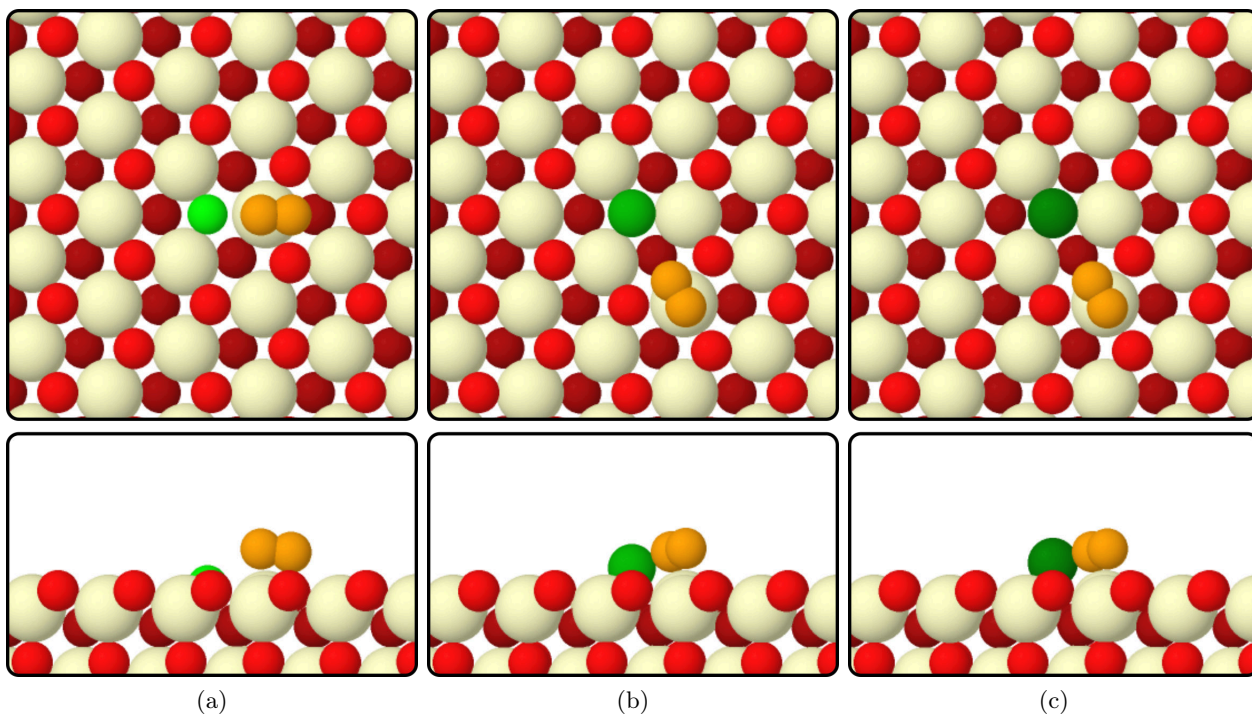

Figure S6: **A superoxide molecule adsorbed in the vicinity of a surface halogen impurity.** (a) Fluorine. (b) Chlorine. (c) Bromine. Colour scheme: bright red – surface oxygen; dark red – sub-surface oxygen; off-white – cerium(IV); green – halogen; orange – superoxide molecule.

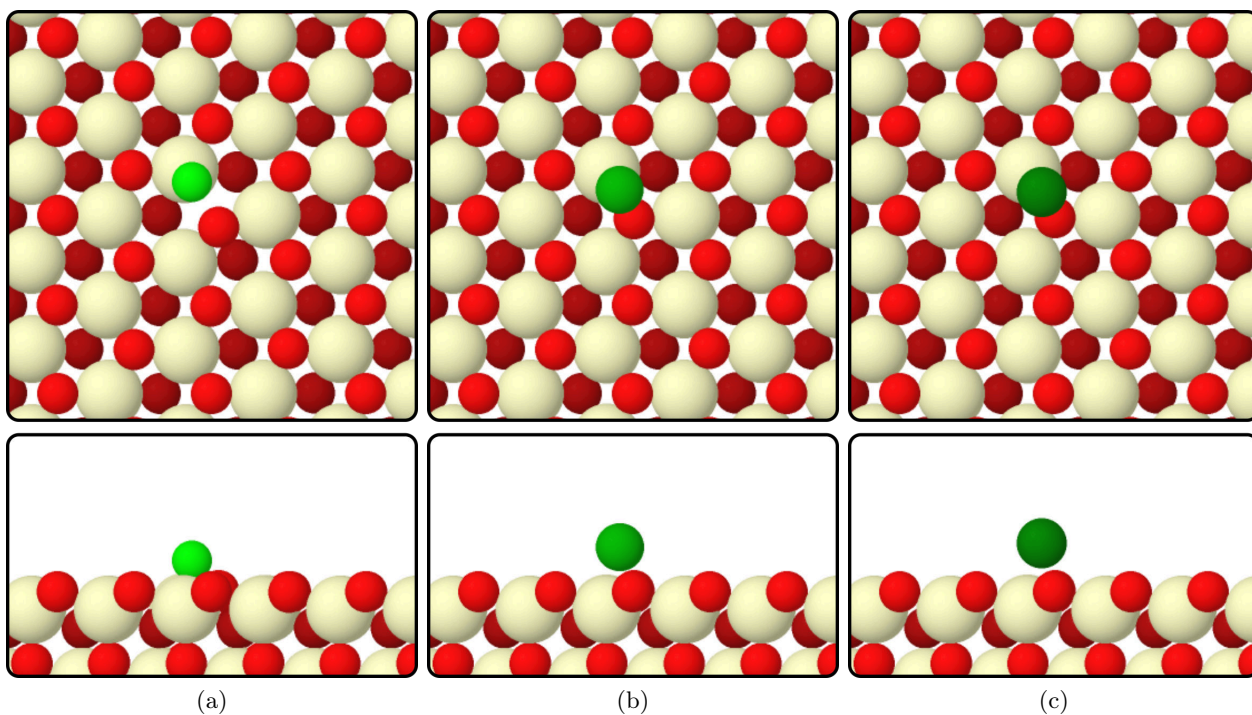

Figure S7: **A halogen atom adsorbed on the stoichiometric surface.** (a) Fluorine. (b) Chlorine. (c) Bromine. Colour scheme: bright red – surface oxygen; dark red – sub-surface oxygen; off-white – cerium(IV); green – halogen.

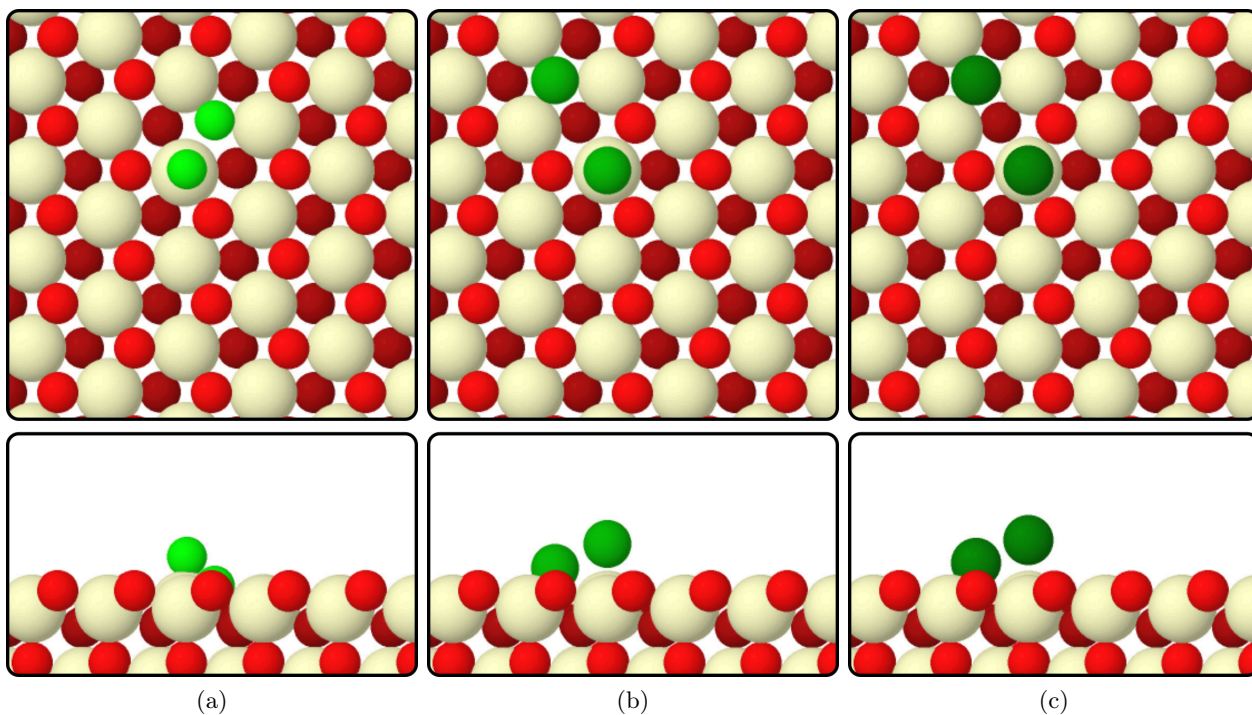

Figure S8: **A halogen atom adsorbed in the vicinity of a surface halogen impurity.** (a) Fluorine. (b) Chlorine. (c) Bromine. Colour scheme: bright red – surface oxygen; dark red – sub-surface oxygen; off-white – cerium(IV); green – halogen.

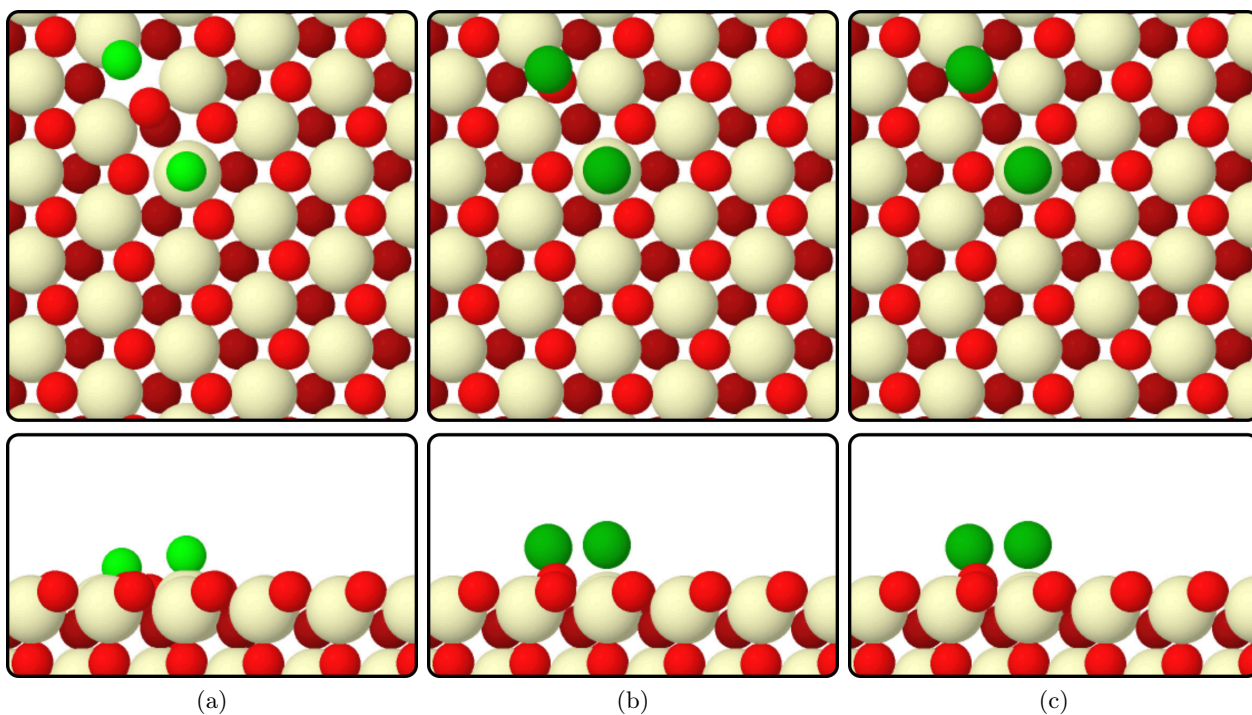

Figure S9: **A pair of halogen atoms adsorbed on the stoichiometric surface.** (a) Fluorine. (b) Chlorine. (c) Bromine. Colour scheme: bright red – surface oxygen; dark red – sub-surface oxygen; off-white – cerium(IV); green – halogen.
